# Supplementary material for: Highly porous nitrogen-doped polyimine-based carbons with adjustable microstructures for CO2 capture
Source: Royal Society of Chemistry journal article supplement (doi:10.1039/c3ta11995e), 2013-01-01
Supplement: c3ta11995e.pdf [file c3ta11995e.pdf]

**Highly porous nitrogen-doped polyimine-based carbons with  
adjustable microstructures for CO<sub>2</sub> capture**

*Jiacheng Wang,<sup>\*a,b</sup> Irena Senkowska,<sup>b</sup> Martin Oschatz,<sup>b</sup> Martin R. Lohe,<sup>b</sup>  
Lars Borchardt,<sup>b</sup> Andreas Heerwig,<sup>b</sup> Qian Liu,<sup>a</sup> and Stefan Kaskel<sup>\*b</sup>*

<sup>a</sup>State Key Laboratory of High Performance Ceramics and Superfine Microstructure,  
Shanghai Institute of Ceramics, 1295 Dingxi Road, Shanghai 200050, China

<sup>b</sup>Department of Inorganic Chemistry, Dresden University of Technology, Bergstraße  
66, 01069 Dresden, Germany

\*Corresponding author. Email address: [jiacheng.wang@mail.sic.ac.cn](mailto:jiacheng.wang@mail.sic.ac.cn)

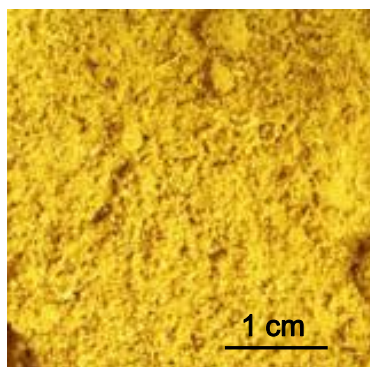

Fig. S1 The photograph of the as-prepared polyimine.

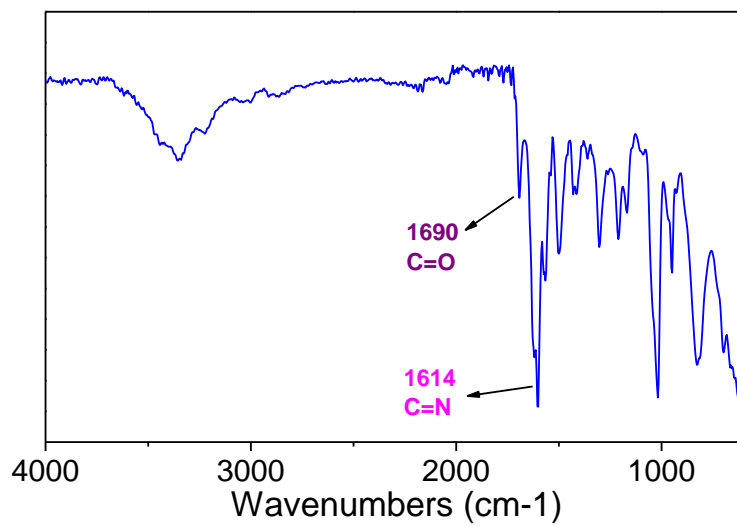

Fig. S2 FT-IR spectrum of polyimine.

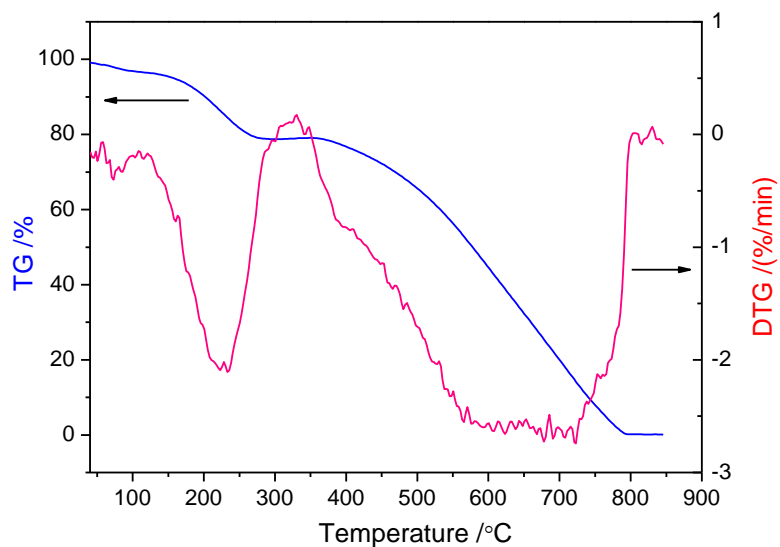

Fig. S3 TG-DTG curves of polyimine in an air flow (10 °C/min). The mass loss of ~17.2 wt% between 140 °C and 300 °C should be ascribed to the evaporation of DMSO in polyimine. The mass of ~78.6 wt% between 380 °C to 800 °C should be due to the combustion of polyimine in air. The final residual mass is ~0.3 wt% at 850 °C.

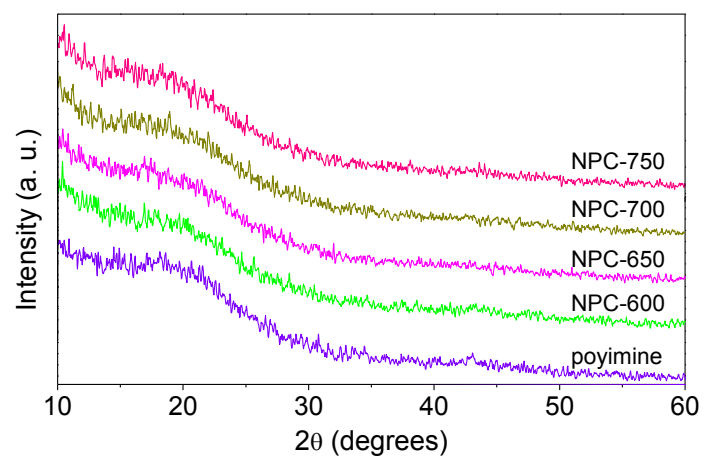

Fig. S4 XRD patterns of polyimine and NPCs.

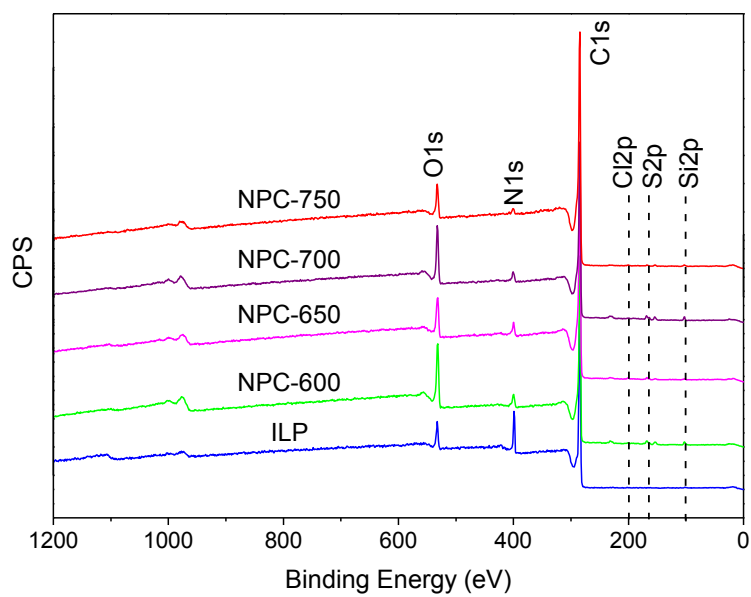

Fig. S5 XPS spectra of polyimine and various NPCs.

Table S1 Elemental analysis of polyimine and various NPCs determined by XPS analysis.

| Sample    | N [wt%] | C [wt%] | O [wt%] | S [wt%] | Si [wt%] | Cl [wt%] |
|-----------|---------|---------|---------|---------|----------|----------|
| polyimine | 10.56   | 82.90   | 6.54    | ---     | ---      | ---      |
| NPC-600   | 4.54    | 77.69   | 12.82   | 2.16    | 2.62     | 0.17     |
| NPC-650   | 4.05    | 85.97   | 7.86    | 1.26    | 0.61     | 0.26     |
| NPC-700   | 3.49    | 79.54   | 11.35   | 2.47    | 2.90     | 0.25     |
| NPC-750   | 1.45    | 90.62   | 6.11    | 0.46    | 1.09     | 0.26     |

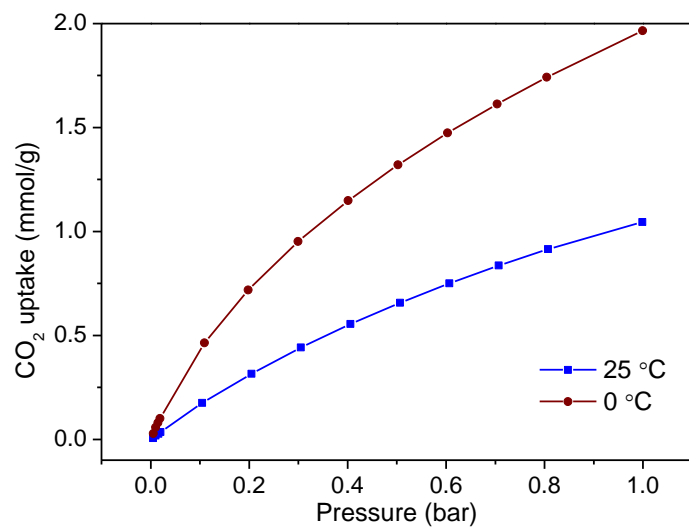

Fig. S6 CO<sub>2</sub> sorption isotherms of polyimine at 25 and 0 °C, respectively.



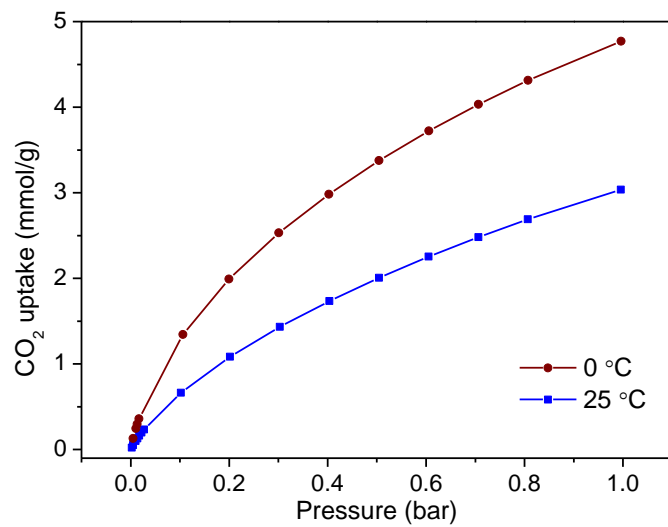

Fig. S7 CO<sub>2</sub> sorption isotherms of NPC-600 at 25 and 0 °C, respectively.

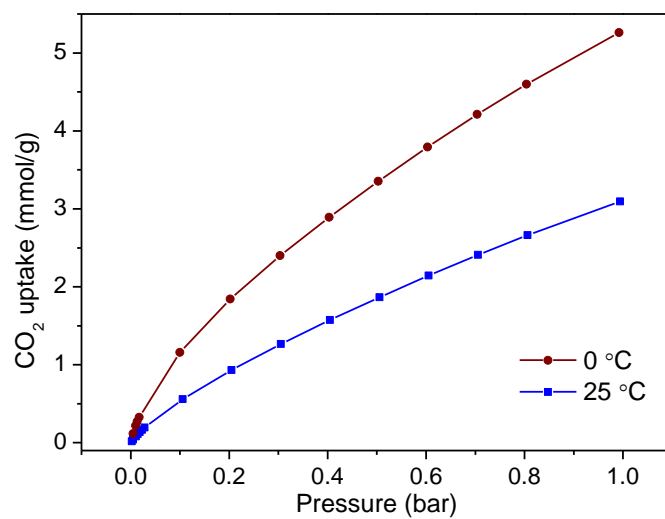

Fig. S8 CO<sub>2</sub> sorption isotherms of NPC-650 at 25 and 0 °C, respectively.

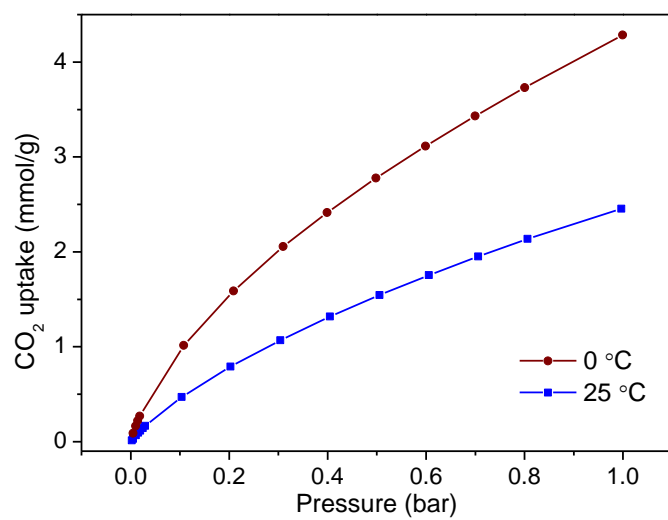

Fig. S9 CO<sub>2</sub> sorption isotherms of NPC-700 at 25 and 0 °C, respectively.

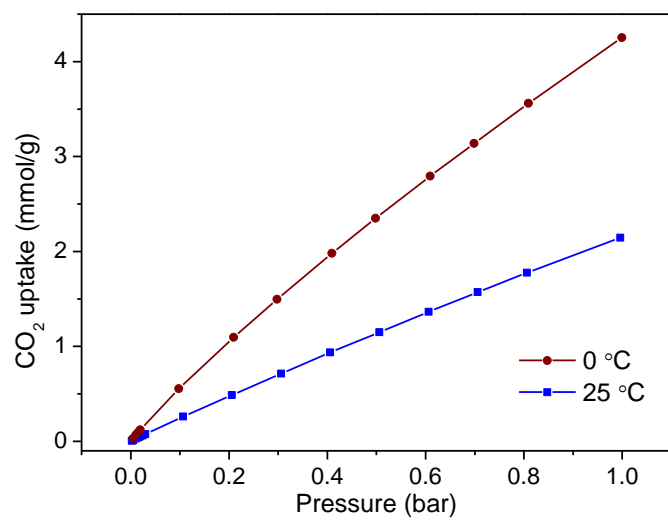

Fig. S10 CO<sub>2</sub> sorption isotherms of NPC-750 at 25 and 0 °C, respectively.

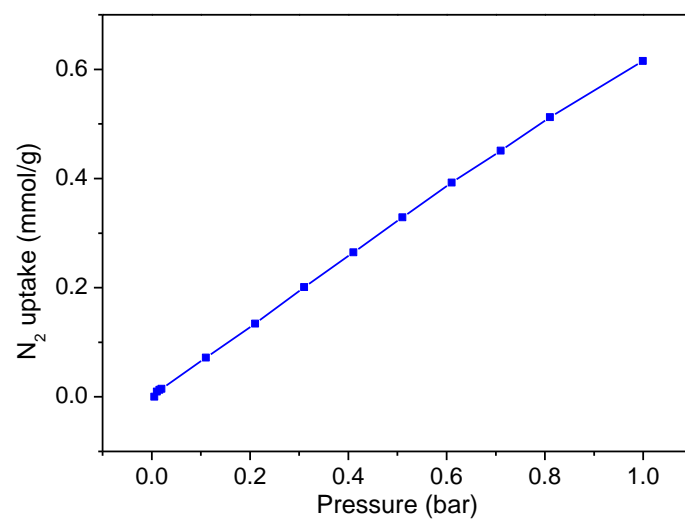

Fig. S11 N<sub>2</sub> adsorption isotherm of NPC-650 at 25 °C.

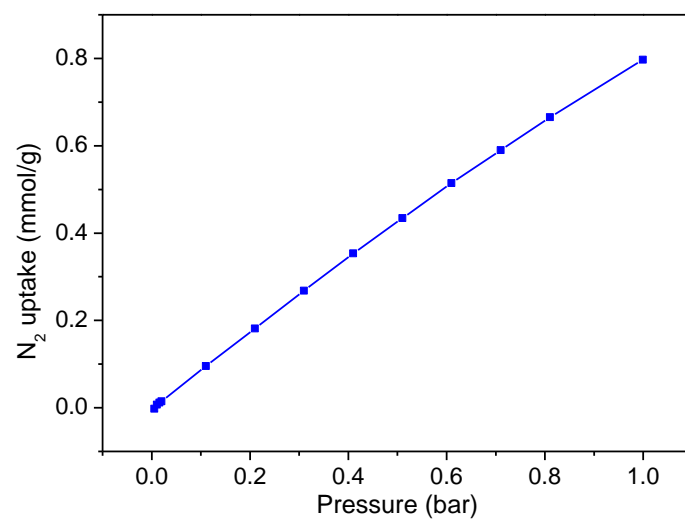

Fig. S12 N<sub>2</sub> sorption isotherm of NPC-650 at 0 °C.

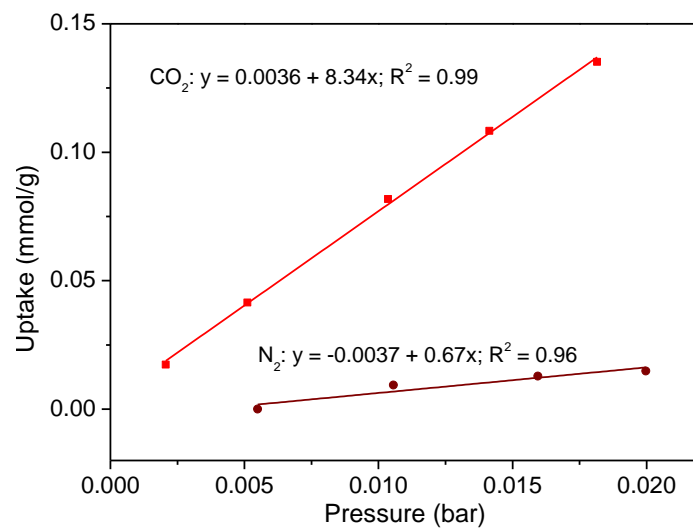

Fig. S13 Initial slopes from CO<sub>2</sub> and N<sub>2</sub> adsorption isotherms at 25 °C for NPC-650.

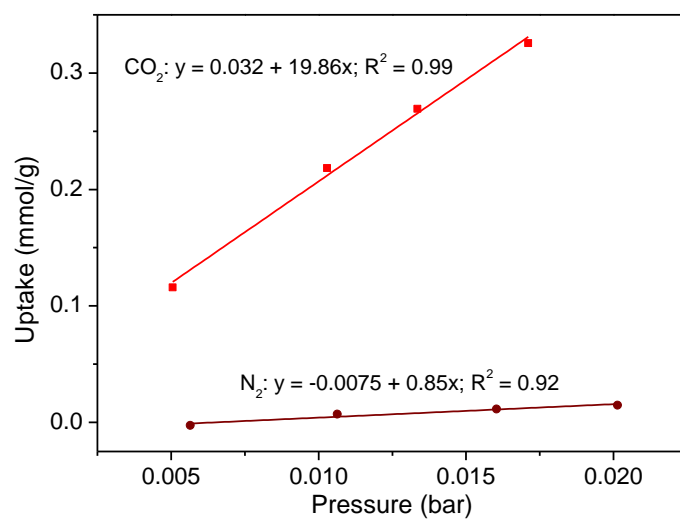

Fig. S14 Initial slopes from CO<sub>2</sub> and N<sub>2</sub> adsorption isotherms at 0 °C for NPC-650.



Table S2 Comparison of the NPCs and some recently reported adsorbents for CO<sub>2</sub> capture at 1 bar and 25 or 0 °C.

| Sample                                                           | CO <sub>2</sub> uptake, mmol/g (mg/g) |                   | Ref.             |
|------------------------------------------------------------------|---------------------------------------|-------------------|------------------|
|                                                                  | 25 °C                                 | 0 °C              |                  |
| <b>NPC-650</b>                                                   | <b>3.1 (136)</b>                      | <b>5.26 (231)</b> | <b>This work</b> |
| Activated graphite nanofibers                                    | 1.3 (59)                              | ---               | 1                |
| Conjugated microporous polymers                                  | 1.45 (64)                             | ---               | 2                |
| Olive stones-based carbon activated by CO <sub>2</sub>           | 2.0 (86)                              | ---               | 3                |
| Melamine-formaldehyde resin derived carbon                       | 2.25 (99)                             | ---               | 4                |
| Hierarchical nanoporous melamine resin sponges                   | ---                                   | 1.6 (70.4)        | 5                |
| Urea-formaldehyde and melamine-formaldehyde resin -based carbons | 1.86 (82)                             | ---               | 6                |
| Zeolitic imidazolate frameworks                                  | 2.7 (119)                             | ---               | 7                |
| CMK-3                                                            | 2.2 (96)                              | 3.8 (166)         | 8                |
| CMK-8                                                            | 2.1 (90)                              | ---               | 8                |
| Nitrogen-doped hierarchical carbons                              | 2.2 (97)                              | ---               | 9                |
| Sulfur-doped microporous carbon                                  | 2.5 (110)                             | ---               | 10               |
| Nitrogen-doped porous carbon                                     | 1.39 (61)                             | 2.39 (105)        | 11               |
| N-doped zeolite Y template carbon                                | 2.36 (104)                            | ---               | 12               |
| Nitrogen-doped hierarchical porous carbon                        | 3.2 (141)                             | ---               | 13               |
| Nanostructured templated carbon                                  | 3.2 (141)                             | ---               | 14               |
| Mesoporous carbon supporting CaO                                 | 3.2 (141)                             | ---               | 15               |
| Triptycene-derived benzimidazole-linked polymers                 | 3.3 (145)                             | 5.1 (225)         | 16               |
| Poly(benzoxazine-co-resol)-based porous carbon                   | 3.3 (132)                             | 4.9 (216)         | 17               |
| Nitrogen-doped porous carbons                                    | 3.13 (137)                            | ---               | 18               |
| Nitrogen-doped ordered mesoporous carbon                         | 3.3 (145)                             | ---               | 19               |

## References

1. L.-Y. Meng and S.-J. Park, *J. Colloid Interface Sci.*, 2010, **352**, 498.
2. S. Ren, R. Dawson, A. Laybourn, J.-X. Jiang, Y. Khimiyak, D. J. Adams and A. I. Cooper, *Polymer Chem.*, 2012, **3**, 928.
3. M. G. Plaza, C. Pevida, B. Arias, J. Feroso, M. D. Casal, C. F. Martin, F. Rubiera and J. J. Pis, *Fuel*, 2009, **88**, 2442.
4. C. Pevida, T. C. Drage and C. E. Snape, *Carbon*, 2008, **46**, 1464.
5. A. Wilke and J. Weber, *J. Mater. Chem.*, 2011, **21**, 5226.
6. T. C. Drage, A. Arenillas, K. M. Smith, C. Pevida, S. Piippo and C. E. Snape, *Fuel*, 2007, **86**, 22.
7. R. Banerjee, H. Furukawa, D. Britt, C. Knobler, M. O’Keeffe and O. M. Yaghi, *J. Am. Chem. Soc.*, 2009, **131**, 3875.
8. M. Sevilla and A. B. Fuertes, *J. Colloid Interface Sci.*, 2012, **366**, 147.
9. M. C. Gutierrez, D. Carriazo, C. O. Ania, J. B. Parra, M. L. Ferrer and F. del Monte, *Energy Environ. Sci.*, 2011, **4**, 3535.
10. Y. Xia, Y. Zhu and Y. Tang, *Carbon*, 2012, DOI:j.carbon.2012.07.044.
11. Z. Zhang, K. Wang, J. D. Atkinson, X. Yan, X. Li, M. J. Rood and Z. Yan, *J. Hazard. Mater.*, 2012, **229–230**, 183.
12. J. Zhou, W. Li, Z. Zhang, W. Xing and S. Zhuo, *RSC Adv.*, 2012, **2**, 161.
13. C. Chen, J. Kim and W.-S. Ahn, *Fuel*, 2012, **95**, 360.
14. L. Wang and R. T. Yang, *J. Phys. Chem. C*, 2011, **116**, 1099.
15. Z. Wu, N. Hao, G. Xiao, L. Liu, P. Webley and D. Zhao, *Phys. Chem. Chem. Phys.*, 2011, **13**, 2495.
16. M. G. Rabbani, T. E. Reich, R. M. Kassab, K. T. Jackson and H. M. El-Kaderi, *Chem. Commun.*, 2012, **48**, 1141.
17. G.-P. Hao, W.-C. Li, D. Qian, G.-H. Wang, W.-P. Zhang, T. Zhang, A.-Q. Wang, F. Schueth, H.-J. Bongard and A.-H. Lu, *J. Am. Chem. Soc.*, 2011, **133**, 11378.
18. G.-P. Hao, W.-C. Li, D. Qian and A.-H. Lu, *Adv. Mater.*, 2010, **22**, 853.
19. L. Liu, Q.-F. Deng, T.-Y. Ma, X.-Z. Lin, X.-X. Hou, Y.-P. Liu and Z.-Y. Yuan, *J. Mater. Chem.*, 2011, **21**, 16001.
